# Supplementary material for: SARS-CoV-2 from COVID-19 Patients in the Republic of Moldova: Whole-Genome Sequencing Results
Source: MDPI journal article supplement (doi:10.3390/v14102310), 2022-10-21
Supplement: s1 [file s1]

Supplementary Table S1: Overview of detected SNSs (single nucleotide substitutions) in Delta whole-genome SARS-Cov-2 isolates from the Republic of Moldova.

| Genomic position in the reference genome | Nucleotide in the reference genome hCoV-19/Wuhan/WIV04/2019 EPI_ISL_402124 | Nucleotide in the samples from Republic of Moldova | Genomic region | Number of occurrences of a mutation | Amino acid substitution |
|------------------------------------------|----------------------------------------------------------------------------|----------------------------------------------------|----------------|-------------------------------------|-------------------------|
| 186                                      | C                                                                          | T                                                  | ORF1a          | 1                                   | ----                    |
| 193                                      | C                                                                          | T                                                  | ORF1a          | 1                                   | ----                    |
| 203                                      | C                                                                          | T                                                  | ORF1a          | 1                                   | ----                    |
| 210                                      | G                                                                          | T                                                  | ORF1a          | 45                                  | ----                    |
| 213                                      | G                                                                          | T                                                  | ORF1a          | 1                                   | ----                    |
| 241                                      | C                                                                          | T                                                  | ORF1a          | 47                                  | ----                    |
| 361                                      | A                                                                          | G                                                  | ORF1a          | 1                                   | ----                    |
| 521                                      | G                                                                          | A                                                  | ORF1a          | 1                                   | 86 V>I                  |
| 526                                      | G                                                                          | T                                                  | ORF1a          | 3                                   | 87 E>D                  |
| 687                                      | A                                                                          | G                                                  | ORF1a          | 1                                   | 141 K>R                 |
| 745                                      | C                                                                          | T                                                  | ORF1a          | 1                                   | ----                    |
| 1048                                     | G                                                                          | T                                                  | ORF1a          | 25                                  | 261 K>N                 |
| 1191                                     | C                                                                          | T                                                  | ORF1a          | 1                                   | 309 P>L                 |
| 1267                                     | C                                                                          | T                                                  | ORF1a          | 1                                   | ----                    |
| 1274                                     | G                                                                          | T                                                  | ORF1a          | 1                                   | 337 V>F                 |
| 1514                                     | C                                                                          | T                                                  | ORF1a          | 1                                   | 417 H>Y                 |
| 1625                                     | C                                                                          | T                                                  | ORF1a          | 1                                   | 454 L>F                 |
| 1667                                     | A                                                                          | G                                                  | ORF1a          | 1                                   | 468 K>E                 |
| 1758                                     | C                                                                          | T                                                  | ORF1a          | 1                                   | 498 A>V                 |
| 1820                                     | G                                                                          | A                                                  | ORF1a          | 2                                   | 519 G>S                 |
| 1824                                     | C                                                                          | T                                                  | ORF1a          | 1                                   | 520 A>V                 |
| 1877                                     | T                                                                          | C                                                  | ORF1a          | 1                                   | 538 S>P                 |
| 1912                                     | C                                                                          | T                                                  | ORF1a          | 1                                   | ----                    |
| 2144                                     | G                                                                          | T                                                  | ORF1a          | 1                                   | 627 V>F                 |
| 2494                                     | G                                                                          | T                                                  | ORF1a          | 1                                   | 743 E>D                 |
| 2518                                     | G                                                                          | T                                                  | ORF1a          | 3                                   | ----                    |
| 2539                                     | G                                                                          | A                                                  | ORF1a          | 1                                   | ----                    |
| 2623                                     | C                                                                          | T                                                  | ORF1a          | 1                                   | ----                    |
| 2746                                     | T                                                                          | C                                                  | ORF1a          | 1                                   | ----                    |

|      |   |   |       |    |          |
|------|---|---|-------|----|----------|
| 2908 | A | G | ORF1a | 2  | ----     |
| 3037 | C | T | ORF1a | 48 | ----     |
| 3066 | G | A | ORF1a | 1  | 934 G>D  |
| 3085 | G | T | ORF1a | 1  | 940 E>D  |
| 3092 | C | T | ORF1a | 1  | 943 P>S  |
| 3329 | A | C | ORF1a | 1  | 1022 T>P |
| 3685 | G | A | ORF1a | 4  | ----     |
| 3807 | A | G | ORF1a | 1  | 1181 N>S |
| 3871 | G | T | ORF1a | 1  | 1202 K>N |
| 3923 | C | A | ORF1a | 1  | 1220 P>T |
| 4084 | C | T | ORF1a | 1  | ----     |
| 4181 | G | T | ORF1a | 46 | 1306 A>S |
| 4237 | T | C | ORF1a | 5  | ----     |
| 4300 | G | T | ORF1a | 1  | ----     |
| 4438 | C | T | ORF1a | 1  | ----     |
| 4777 | C | T | ORF1a | 1  | ----     |
| 4794 | C | T | ORF1a | 1  | 1510 S>F |
| 4916 | A | G | ORF1a | 1  | 1551 I>V |
| 5045 | T | G | ORF1a | 1  | 1594 F>V |
| 5184 | C | T | ORF1a | 1  | 1640 P>L |
| 5203 | C | T | ORF1a | 1  | ----     |
| 5206 | G | T | ORF1a | 1  | 1647 M>I |
| 5437 | G | T | ORF1a | 3  | 1724 E>D |
| 5467 | C | T | ORF1a | 3  | ----     |
| 5584 | A | G | ORF1a | 1  | ----     |
| 5629 | G | T | ORF1a | 1  | ----     |
| 5668 | G | T | ORF1a | 1  | 1801 E>D |
| 5886 | C | T | ORF1a | 1  | 1874 T>I |
| 6056 | G | A | ORF1a | 1  | 1931 V>I |
| 6094 | G | T | ORF1a | 1  | 1943 Q>H |
| 6401 | C | T | ORF1a | 1  | ----     |
| 6402 | C | T | ORF1a | 46 | 2046 P>L |
| 6445 | C | T | ORF1a | 1  | ----     |
| 6730 | C | T | ORF1a | 1  | ----     |
| 6941 | C | T | ORF1a | 1  | ----     |
| 6968 | C | T | ORF1a | 1  | ----     |
| 7124 | C | T | ORF1a | 46 | 2287 P>S |
| 7190 | A | G | ORF1a | 1  | 2309 I>V |

|       |   |   |       |    |          |
|-------|---|---|-------|----|----------|
| 7420  | C | T | ORF1a | 2  | ----     |
| 7564  | C | T | ORF1a | 2  | ----     |
| 7768  | C | T | ORF1a | 3  | ----     |
| 7851  | C | T | ORF1a | 11 | 2529 A>V |
| 7936  | G | T | ORF1a | 1  | ----     |
| 7976  | T | C | ORF1a | 1  | ----     |
| 7976  | T | C | ORF1a | 4  | ----     |
| 8240  | C | T | ORF1a | 1  | 2659 H>Y |
| 8247  | C | T | ORF1a | 1  | 2661 S>F |
| 8929  | T | C | ORF1a | 1  | ----     |
| 8982  | C | T | ORF1a | 1  | ----     |
| 8986  | C | T | ORF1a | 46 | ----     |
| 9053  | G | T | ORF1a | 46 | 2930 V>L |
| 9532  | C | T | ORF1a | 1  | ----     |
| 9712  | C | T | ORF1a | 1  | ----     |
| 9891  | C | T | ORF1a | 2  | 3209 A>V |
| 10029 | C | T | ORF1a | 44 | 3255 T>I |
| 10078 | C | T | ORF1a | 44 | ----     |
| 10761 | A | G | ORF1a | 1  | 3449 K>R |
| 11201 | A | G | ORF1a | 46 | 3646 T>A |
| 11270 | A | G | ORF1a | 1  | 3669 M>V |
| 11299 | G | T | ORF1a | 1  | 3678 K>N |
| 11300 | C | T | ORF1a | 1  | ----     |
| 11332 | A | G | ORF1a | 46 | ----     |
| 11418 | T | C | ORF1a | 2  | 3718 V>A |
| 11514 | C | T | ORF1a | 1  | 3750 T>I |
| 12118 | T | G | ORF1a | 1  | ----     |
| 12514 | G | T | ORF1a | 1  | ----     |
| 12526 | A | T | ORF1a | 1  | ----     |
| 12946 | T | C | ORF1a | 1  | ----     |
| 13019 | C | T | ORF1a | 1  | ----     |
| 13078 | T | C | ORF1a | 1  | ----     |
| 13136 | A | G | ORF1a | 1  | 4291 I>V |
| 13210 | T | C | ORF1a | 1  | ----     |
| 13458 | C | T | ORF1a | 1  | 4398 S>L |
| 13712 | A | G | ORF1b | 1  | 82 K>R   |
| 13981 | C | T | ORF1b | 1  | 172 R>C  |
| 14187 | G | A | ORF1b | 1  | ----     |

|       |   |   |       |    |          |
|-------|---|---|-------|----|----------|
| 14318 | C | T | ORF1b | 1  | 284 T>I  |
| 14408 | C | G | ORF1b | 4  | 314 P>R  |
| 14408 | C | T | ORF1b | 44 | 314 P>L  |
| 14925 | C | T | ORF1b | 1  | ----     |
| 15380 | G | T | ORF1b | 1  | 638 S>I  |
| 15451 | G | A | ORF1b | 48 | 662 G>S  |
| 15543 | G | T | ORF1b | 2  | ----     |
| 15714 | C | T | ORF1b | 1  | ----     |
| 15735 | T | C | ORF1b | 1  | ----     |
| 15763 | C | T | ORF1b | 5  | ----     |
| 15848 | C | T | ORF1b | 1  | 794 T>I  |
| 15908 | G | T | ORF1b | 1  | 814 G>V  |
| 15952 | C | A | ORF1b | 2  | 829 L>I  |
| 15958 | G | T | ORF1b | 2  | 831 A>S  |
| 16111 | C | T | ORF1b | 1  | ----     |
| 16248 | T | A | ORF1b | 1  | ----     |
| 16329 | C | T | ORF1b | 1  | ----     |
| 16393 | C | T | ORF1b | 1  | 976 P>S  |
| 16466 | C | T | ORF1b | 48 | 1000 P>L |
| 16538 | A | G | ORF1b | 1  | 1024 D>G |
| 16733 | C | T | ORF1b | 1  | 1089 S>L |
| 17019 | G | A | ORF1b | 1  | ----     |
| 17025 | T | C | ORF1b | 1  | ----     |
| 17040 | T | C | ORF1b | 11 | ----     |
| 17156 | C | T | ORF1b | 1  | 1230 T>I |
| 17371 | G | T | ORF1b | 1  | 1302 A>S |
| 17999 | C | T | ORF1b | 1  | 1511 T>I |
| 18167 | C | T | ORF1b | 1  | 1567 P>L |
| 18176 | C | T | ORF1b | 1  | 1570 P>L |
| 18526 | C | T | ORF1b | 1  | 1687 R>C |
| 18693 | C | T | ORF1b | 1  | ----     |
| 18695 | C | T | ORF1b | 1  | 1743 T>I |
| 18713 | C | T | ORF1b | 1  | 1749 A>V |
| 18744 | C | T | ORF1b | 3  | ----     |
| 18816 | G | A | ORF1b | 9  | ----     |
| 18828 | C | T | ORF1b | 1  | ----     |
| 18905 | G | A | ORF1b | 1  | 1813 R>H |
| 19107 | T | C | ORF1b | 1  | ----     |

|       |   |   |       |    |          |
|-------|---|---|-------|----|----------|
| 19160 | C | T | ORF1b | 1  | 1898 S>F |
| 19219 | G | T | ORF1b | 1  | ----     |
| 19220 | C | T | ORF1b | 46 | 1918 A>V |
| 19273 | C | T | ORF1b | 1  | 1936 P>S |
| 19512 | C | T | ORF1b | 1  | ----     |
| 19524 | C | T | ORF1b | 3  | ----     |
| 19641 | T | C | ORF1b | 1  | ----     |
| 19872 | G | T | ORF1b | 2  | ----     |
| 19875 | C | T | ORF1b | 1  | ----     |
| 19983 | C | T | ORF1b | 1  | ----     |
| 20055 | A | G | ORF1b | 1  | ----     |
| 20057 | G | T | ORF1b | 1  | ----     |
| 20060 | G | T | ORF1b | 7  | 2198 S>I |
| 20133 | C | T | ORF1b | 4  | ----     |
| 20247 | G | T | ORF1b | 2  | 2260 M>I |
| 20262 | A | G | ORF1b | 1  | ----     |
| 20325 | C | T | ORF1b | 1  | ----     |
| 20438 | G | T | ORF1b | 1  | 2324 S>I |
| 20523 | T | C | ORF1b | 1  | ----     |
| 20709 | G | T | ORF1b | 1  | 2414 M>I |
| 20880 | T | A | ORF1b | 1  | ----     |
| 20937 | G | T | ORF1b | 5  | ----     |
| 21034 | C | T | ORF1b | 1  | 2523 L>F |
| 21137 | A | G | ORF1b | 2  | 2557 K>R |
| 21334 | G | T | ORF1b | 5  | 2623 A>S |
| 21409 | C | T | ORF1b | 1  | 2648 P>S |
| 21618 | C | G | S     | 48 | 19 T>R   |
| 21647 | A | G | S     | 1  | 29 T>A   |
| 21721 | C | T | S     | 1  | ----     |
| 21846 | C | T | S     | 14 | 95 T>I   |
| 21859 | C | T | S     | 1  | ----     |
| 21976 | T | C | S     | 1  | ----     |
| 21987 | G | A | S     | 48 | 142 G>D  |
| 21995 | T | C | S     | 7  | 145 Y>H  |
| 22017 | G | T | S     | 1  | ----     |
| 22206 | A | G | S     | 1  | 215 D>G  |
| 22225 | G | T | S     | 1  | ----     |
| 22227 | C | T | S     | 8  | 222 A>V  |

|       |   |   |       |    |          |
|-------|---|---|-------|----|----------|
| 22311 | C | T | S     | 1  | 250 T>I  |
| 22314 | C | T | S     | 3  | 251 P>L  |
| 22458 | C | T | S     | 1  | 299 T>I  |
| 22792 | C | T | S     | 1  | ----     |
| 22917 | T | G | S     | 48 | 452 L>R  |
| 22993 | C | T | S     | 1  |          |
| 22995 | C | A | S     | 48 | 478 T>K  |
| 23017 | T | C | S     | 1  | ----     |
| 23031 | T | C | S     | 1  | 490 F>S  |
| 23086 | C | T | S     | 1  | ----     |
| 23114 | C | T | S     | 1  | ----     |
| 23188 | C | T | S     | 1  | ----     |
| 23323 | T | C | S     | 1  | ----     |
| 23401 | G | T | S     | 10 | ----     |
| 23403 | A | G | S     | 48 | 614 D>G  |
| 23584 | T | C | S     | 1  | ----     |
| 23604 | C | G | S     | 48 | 681 P>R  |
| 23609 | C | T | S     | 1  | 683 R>W  |
| 23683 | C | T | S     | 1  | ----     |
| 23834 | A | G | S     | 1  | 758 S>G  |
| 23868 | G | C | S     | 1  | 769 G>A  |
| 24095 | G | T | S     | 1  | 845 A>S  |
| 24110 | A | C | S     | 1  | 850 I>L  |
| 24130 | C | T | S     | 1  | ----     |
| 24138 | C | T | S     | 1  | 859 T>I  |
| 24175 | T | C | S     | 1  | ----     |
| 24368 | G | T | S     | 1  | 936 D>Y  |
| 24410 | G | A | S     | 48 | 950 D>N  |
| 24707 | C | A | S     | 1  | 1049 L>I |
| 25088 | G | T | S     | 1  | 1176 V>F |
| 25091 | G | T | S     | 5  | 1177 V>L |
| 25135 | G | T | S     | 1  | 1191 K>N |
| 25315 | A | C | S     | 1  | ----     |
| 25401 | G | T | ORF3a | 1  | 3 L>F    |
| 25439 | A | C | ORF3a | 1  | 16 K>T   |
| 25445 | G | T | ORF3a | 1  | 18 G>V   |
| 25469 | C | T | ORF3a | 48 | 26 S>L   |
| 25471 | G | T | ORF3a | 1  | ----     |

|       |   |   |       |    |         |
|-------|---|---|-------|----|---------|
| 25483 | G | A | ORF3a | 1  | ----    |
| 25513 | C | T | ORF3a | 2  | 41 L>F  |
| 25544 | C | T | ORF3a | 1  | 51 A>V  |
| 25572 | C | T | ORF3a | 1  | ----    |
| 25598 | G | T | ORF3a | 1  | 69 W>L  |
| 25614 | C | T | ORF3a | 6  | ----    |
| 25644 | G | T | ORF3a | 1  | ----    |
| 25658 | C | T | ORF3a | 1  | 89 T>I  |
| 25710 | C | T | ORF3a | 1  | ----    |
| 25806 | A | G | ORF3a | 1  | ----    |
| 25844 | C | T | ORF3a | 1  | 151 T>I |
| 25906 | G | T | ORF3a | 1  | 172 G>C |
| 25985 | A | T | ORF3a | 2  | 198 K>I |
| 26063 | G | T | ORF3a | 1  | 224 G>V |
| 26109 | G | T | ORF3a | 2  | 239 E>D |
| 26208 | C | T | ORF3a | 1  | ----    |
| 26370 | C | T | M     | 1  | ----    |
| 26421 | C | T | M     | 1  | ----    |
| 26526 | G | T | M     | 5  | 2 A>S   |
| 26537 | C | T | M     | 1  | ----    |
| 26767 | T | C | M     | 48 | 82 I>T  |
| 26996 | C | T | M     | 1  | ----    |
| 27271 | G | C | ORF6  | 1  | 24 V>L  |
| 27346 | T | C | ORF6  | 1  | 49 Y>H  |
| 27393 | C | T | ORF7a | 1  | ----    |
| 27516 | G | T | ORF7a | 1  | ----    |
| 27526 | C | T | ORF7a | 2  | ----    |
| 27527 | C | T | ORF7a | 24 | 45 P>L  |
| 27600 | C | T | ORF7a | 2  | ----    |
| 27613 | G | T | ORF7a | 4  | 74 V>F  |
| 27638 | T | C | ORF7a | 46 | 82 V>A  |
| 27739 | C | T | ORF7a | 1  | 116 L>F |
| 27745 | A | G | ORF7a | 1  | 118 R>G |
| 27752 | C | T | ORF7a | 46 | 120 T>I |
| 27754 | G | T | ORF7a | 1  | 121 E>* |
| 27874 | C | T | ORF7b | 46 | 40 T>I  |
| 27919 | T | C | ORF8  | 1  | 9 I>T   |
| 27930 | G | A | ORF8  | 1  | 13 V>I  |

|       |   |   |       |    |         |
|-------|---|---|-------|----|---------|
| 27945 | C | T | ORF8  | 2  | 18 Q>*  |
| 28001 | G | T | ORF8  | 1  | ----    |
| 28054 | C | T | ORF8  | 6  | 54 S>L  |
| 28075 | G | T | ORF8  | 3  | 61 C>F  |
| 28086 | G | T | ORF8  | 4  | 65 A>S  |
| 28119 | A | G | ORF8  | 1  | 76 I>V  |
| 28299 | A | T | ORF9b | 3  | 6 S>C   |
| 28357 | G | A | ORF9b | 4  | 25 R>K  |
| 28432 | C | T | ORF9b | 1  | 50 S>L  |
| 28461 | A | G | ORF9b | 48 | 60 T>A  |
| 28471 | C | T | ORF9b | 1  | 63 S>F  |
| 28727 | G | T | N     | 1  | 152 A>S |
| 28744 | C | T | N     | 2  | ----    |
| 28756 | T | C | N     | 1  | ----    |
| 28822 | T | A | N     | 1  | ----    |
| 28881 | G | T | N     | 48 | 203 R>M |
| 28887 | C | T | N     | 1  | 205 T>I |
| 28916 | G | T | N     | 45 | 215 G>C |
| 28957 | C | T | N     | 1  | ----    |
| 28985 | G | T | N     | 1  | 238 G>C |
| 29009 | G | A | N     | 1  | 246 V>I |
| 29137 | C | T | N     | 1  | ----    |
| 29260 | G | T | N     | 1  | ----    |
| 29358 | C | T | N     | 1  | ----    |
| 29392 | G | T | N     | 1  | 373 K>N |
| 29402 | G | T | N     | 48 | 377 D>Y |
| 29418 | T | C | N     | 1  | 382 L>S |
| 29528 | G | T | N     | 1  | 419 A>S |
| 29540 | G | T | N     | 1  | ----    |
| 29557 | G | T | N     | 1  | ----    |
| 29690 | G | T | N     | 1  | ----    |
| 29710 | T | A | N     | 1  | ----    |
| 29726 | T | C | N     | 1  | ----    |
| 29742 | G | T | N     | 48 | ----    |



Supplementary Table S2: Overview of detected SNSs (single nucleotide substitutions) in Omicron whole-genome SARS-Cov-2 isolates from Republic of Moldova.

| Genomic position in the reference genome | Nucleotide in the reference genome hCoV-19/Wuhan/WIV04/2019 EPI_ISL_402124 | Nucleotide in the samples from Republic of Moldova | Genomic region | Number of occurrences of a mutation | Amino acid substitution |
|------------------------------------------|----------------------------------------------------------------------------|----------------------------------------------------|----------------|-------------------------------------|-------------------------|
| 101                                      | G                                                                          | A                                                  | ORF1a          | 1                                   | -                       |
| 106                                      | C                                                                          | T                                                  | ORF1a          | 1                                   | -                       |
| 241                                      | C                                                                          | T                                                  | ORF1a          | 41                                  | -                       |
| 245                                      | C                                                                          | A                                                  | ORF1a          | 1                                   | -                       |
| 670                                      | T                                                                          | G                                                  | ORF1a          | 25                                  | 135 S>R                 |
| 693                                      | T                                                                          | C                                                  | ORF1a          | 1                                   | 143 F>S                 |
| 945                                      | G                                                                          | T                                                  | ORF1a          | 1                                   | 227 G>V                 |
| 1057                                     | C                                                                          | T                                                  | ORF1a          | 1                                   | -                       |
| 1150                                     | C                                                                          | T                                                  | ORF1a          | 1                                   | -                       |
| 1440                                     | G                                                                          | A                                                  | ORF1a          | 2                                   | 392 G>D                 |
| 1471                                     | C                                                                          | T                                                  | ORF1a          | 2                                   | -                       |
| 1585                                     | A                                                                          | C                                                  | ORF1a          | 6                                   | -                       |
| 2470                                     | C                                                                          | T                                                  | ORF1a          | 2                                   | -                       |
| 2583                                     | C                                                                          | T                                                  | ORF1a          | 1                                   | 773 A>V                 |
| 2695                                     | C                                                                          | T                                                  | ORF1a          | 1                                   | -                       |
| 2721                                     | C                                                                          | T                                                  | ORF1a          | 1                                   | 819 A>V                 |
| 2790                                     | C                                                                          | T                                                  | ORF1a          | 25                                  | 842 T>I                 |
| 2832                                     | A                                                                          | G                                                  | ORF1a          | 22                                  | 856 K>R                 |
| 2902                                     | C                                                                          | T                                                  | ORF1a          | 1                                   | -                       |
| 3037                                     | C                                                                          | T                                                  | ORF1a          | 48                                  | -                       |
| 3052                                     | G                                                                          | A                                                  | ORF1a          | 1                                   | -                       |
| 3140                                     | C                                                                          | T                                                  | ORF1a          | 2                                   | 959 P>S                 |
| 3187                                     | G                                                                          | C                                                  | ORF1a          | 1                                   | 974 E>D                 |
| 3241                                     | C                                                                          | T                                                  | ORF1a          | 2                                   | -                       |
| 3380                                     | T                                                                          | C                                                  | ORF1a          | 1                                   | 1039 Y>H                |
| 3409                                     | A                                                                          | G                                                  | ORF1a          | 1                                   | -                       |
| 3987                                     | C                                                                          | T                                                  | ORF1a          | 1                                   | 1241 T>I                |

|       |   |   |       |    |          |
|-------|---|---|-------|----|----------|
| 4021  | C | T | ORF1a | 1  | -        |
| 4184  | G | A | ORF1a | 25 | 1307 G>S |
| 4321  | C | T | ORF1a | 21 | -        |
| 4331  | C | T | ORF1a | 2  | -        |
| 4579  | T | A | ORF1a | 1  | -        |
| 5386  | T | G | ORF1a | 22 | -        |
| 5672  | C | T | ORF1a | 2  | 1803 P>S |
| 5730  | C | T | ORF1a | 4  | 1822 T>I |
| 5746  | C | T | ORF1a | 1  | -        |
| 5852  | A | G | ORF1a | 1  | 1863 I>V |
| 5924  | G | A | ORF1a | 4  | 1887 V>I |
| 6097  | A | G | ORF1a | 1  | -        |
| 6166  | G | A | ORF1a | 1  | -        |
| 6191  | A | G | ORF1a | 1  | 1976 T>A |
| 6402  | C | T | ORF1a | 1  | 2046 P>L |
| 6723  | C | T | ORF1a | 1  | 2153 T>I |
| 6996  | T | C | ORF1a | 1  | 2244 I>T |
| 7037  | G | T | ORF1a | 2  | 2258 G>C |
| 7324  | T | C | ORF1a | 1  | -        |
| 7399  | A | G | ORF1a | 1  | -        |
| 7401  | C | T | ORF1a | 1  | 2379 A>V |
| 7919  | T | C | ORF1a | 1  | 2552 S>P |
| 8137  | G | T | ORF1a | 1  | -        |
| 8393  | G | A | ORF1a | 22 | 2710 A>T |
| 9344  | C | T | ORF1a | 26 | 3027 L>F |
| 9424  | A | G | ORF1a | 24 | -        |
| 9487  | C | T | ORF1a | 1  | -        |
| 9534  | C | T | ORF1a | 25 | 3090 T>I |
| 9615  | C | T | ORF1a | 1  | 3117 T>I |
| 9733  | C | T | ORF1a | 1  | -        |
| 9866  | C | T | ORF1a | 23 | 3201 L>F |
| 9890  | G | A | ORF1a | 1  | 3209 A>T |
| 10021 | A | G | ORF1a | 1  | -        |
| 10029 | C | T | ORF1a | 47 | 3255 T>I |
| 10135 | T | C | ORF1a | 4  | -        |

|       |   |   |       |    |          |
|-------|---|---|-------|----|----------|
| 10183 | C | T | ORF1a | 1  | -        |
| 10198 | C | T | ORF1a | 26 | -        |
| 10447 | G | A | ORF1a | 26 | -        |
| 10449 | C | A | ORF1a | 48 | 3395 P>H |
| 10815 | C | T | ORF1a | 1  | 3517 S>F |
| 10874 | A | G | ORF1a | 1  | 3537 N>D |
| 11195 | C | T | ORF1a | 1  | 3644 L>F |
| 11475 | T | C | ORF1a | 1  | 3737 I>T |
| 11537 | A | G | ORF1a | 22 | 3758 I>V |
| 12049 | C | T | ORF1a | 2  | -        |
| 12676 | C | T | ORF1a | 1  | -        |
| 12754 | C | T | ORF1a | 1  | -        |
| 12789 | C | T | ORF1a | 2  | 4175 T>I |
| 12781 | C | T | ORF1a | 1  | -        |
| 12880 | C | T | ORF1a | 26 | -        |
| 12897 | C | T | ORF1a | 1  | 4211 P>L |
| 13031 | A | T | ORF1a | 1  | 4256 N>Y |
| 13195 | T | C | ORF1a | 22 | -        |
| 13521 | T | C | ORF1a | 1  | -        |
| 13711 | A | G | ORF1b | 1  | 82 K>E   |
| 13994 | C | T | ORF1b | 1  | 176 A>V  |
| 14408 | C | T | ORF1b | 48 | 314 P>L  |
| 14583 | C | T | ORF1b | 1  | -        |
| 14792 | G | A | ORF1b | 1  | 442 S>N  |
| 14821 | C | T | ORF1b | 1  | 452 P>S  |
| 15063 | A | G | ORF1b | 1  | -        |
| 15240 | C | T | ORF1b | 22 | -        |
| 15714 | C | T | ORF1b | 26 | -        |
| 15924 | C | T | ORF1b | 1  | -        |
| 16089 | G | A | ORF1b | 1  | -        |
| 16254 | T | C | ORF1b | 1  | -        |
| 16289 | C | T | ORF1b | 1  | 941 A>V  |
| 16474 | A | G | ORF1b | 1  | 1003 S>G |
| 16723 | T | C | ORF1b | 1  | -        |
| 16740 | A | C | ORF1b | 1  | 1091 E>D |

|       |   |   |       |    |          |
|-------|---|---|-------|----|----------|
| 16866 | T | G | ORF1b | 1  | -        |
| 16887 | C | T | ORF1b | 2  | -        |
| 17125 | C | T | ORF1b | 1  | 1220 L>F |
| 17410 | C | T | ORF1b | 26 | 1315 R>C |
| 17758 | A | G | ORF1b | 1  | 1431 K>E |
| 18163 | A | G | ORF1b | 48 | 1566 I>V |
| 18557 | C | A | ORF1b | 1  | 1697 T>K |
| 18999 | A | T | ORF1b | 1  | -        |
| 19602 | C | T | ORF1b | 1  | -        |
| 19955 | C | T | ORF1b | 25 | 2163 T>I |
| 20016 | C | T | ORF1b | 1  | -        |
| 20055 | A | G | ORF1b | 26 | -        |
| 20364 | A | G | ORF1b | 1  | -        |
| 20679 | G | A | ORF1b | 1  | -        |
| 20792 | C | A | ORF1b | 1  | 2442 A>E |
| 21575 | C | T | S     | 1  | 5 L>F    |
| 21595 | C | T | S     | 1  | -        |
| 21618 | C | T | S     | 26 | -        |
| 21682 | C | T | S     | 1  | -        |
| 21762 | C | T | S     | 18 | -        |
| 21846 | C | T | S     | 18 | 95 T>I   |
| 21987 | G | A | S     | 26 | 142 G>D  |
| 22200 | T | G | S     | 26 | 213 V>G  |
| 22207 | T | C | S     | 1  | -        |
| 22237 | A | G | S     | 1  | -        |
| 22578 | G | A | S     | 48 | 339 G>D  |
| 22599 | G | A | S     | 5  | 346 R>K  |
| 22673 | T | C | S     | 22 | -        |
| 22674 | C | T | S     | 48 | -        |
| 22679 | T | C | S     | 48 | 373 S>P  |
| 22686 | C | T | S     | 48 | 375 S>F  |
| 22688 | A | G | S     | 26 | 376 T>A  |
| 22775 | G | A | S     | 26 | -        |
| 22786 | A | C | S     | 26 | 408 R>S  |
| 22792 | C | T | S     | 18 | -        |

|       |   |   |       |    |          |
|-------|---|---|-------|----|----------|
| 22813 | G | T | S     | 48 | 417 K>N  |
| 22882 | T | G | S     | 48 | 440 N>K  |
| 22894 | G | A | S     | 1  | -        |
| 22898 | G | A | S     | 22 | 446 G>S  |
| 22992 | G | A | S     | 48 | 477 S>N  |
| 22995 | C | A | S     | 48 | 478 T>K  |
| 23013 | A | C | S     | 48 | 484 E>A  |
| 23040 | A | G | S     | 48 | 493 Q>R  |
| 23048 | G | A | S     | 22 | 496 G>S  |
| 23055 | A | G | S     | 48 | 498 Q>R  |
| 23063 | A | T | S     | 48 | 501 N>Y  |
| 23075 | T | C | S     | 48 | 505 Y>H  |
| 23202 | C | A | S     | 22 | 547 T>K  |
| 23320 | C | T | S     | 1  | -        |
| 23403 | A | G | S     | 48 | 614 D>G  |
| 23525 | C | T | S     | 48 | 655 H>Y  |
| 23599 | T | G | S     | 48 | -        |
| 23604 | C | A | S     | 48 | 681 P>H  |
| 23664 | C | T | S     | 2  | 701 A>V  |
| 23673 | C | T | S     | 1  | 704 S>L  |
| 23679 | C | T | S     | 1  | 706 A>V  |
| 23853 | A | G | S     | 1  | -        |
| 23854 | C | A | S     | 47 | 764 N>K  |
| 23948 | G | T | S     | 47 | 796 D>Y  |
| 24130 | C | A | S     | 20 | 856 N>K  |
| 24385 | A | G | S     | 1  | -        |
| 24424 | A | T | S     | 47 | 954 Q>H  |
| 24433 | A | G | S     | 1  | -        |
| 24469 | T | A | S     | 47 | 969 N>K  |
| 24503 | C | T | S     | 19 | 981 L>F  |
| 24803 | A | G | S     | 3  | 1081 I>V |
| 25000 | C | T | S     | 48 | -        |
| 25157 | G | C | S     | 1  | 1199 D>H |
| 25584 | C | T | ORF3a | 48 | -        |
| 25596 | A | G | ORF3a | 1  | -        |

|       |   |   |       |    |         |
|-------|---|---|-------|----|---------|
| 25624 | C | T | ORF3a | 11 | 78 Y>H  |
| 25690 | G | C | ORF3a | 1  | 100 G>R |
| 25708 | C | T | ORF3a | 4  | 106 L>F |
| 25731 | C | T | ORF3a | 2  | -       |
| 25751 | T | C | ORF3a | 1  | 120 F>S |
| 25782 | C | T | ORF3a | 1  | -       |
| 25855 | G | T | ORF3a | 4  | 155 D>Y |
| 25906 | G | T | ORF3a | 1  | 172 G>C |
| 25936 | C | T | ORF3a | 1  | 182 H>Y |
| 25947 | G | T | ORF3a | 1  | 185 Q>H |
| 26060 | C | T | ORF3a | 26 | 223 T>I |
| 26187 | T | C | E     | 1  | -       |
| 26270 | C | T | E     | 46 | 9 T>I   |
| 26522 | C | T | M     | 1  | -       |
| 26530 | A | G | M     | 19 | 3 D>G   |
| 26577 | C | G | M     | 46 | 19 Q>E  |
| 26681 | C | T | M     | 1  | -       |
| 26700 | G | T | M     | 1  | 60 V>L  |
| 26709 | G | A | M     | 46 | 63 A>T  |
| 26771 | A | G | M     | 1  | -       |
| 26858 | C | T | M     | 26 | -       |
| 26912 | C | T | M     | 1  | -       |
| 27259 | A | C | ORF6  | 48 | -       |
| 27382 | G | C | ORF6  | 26 | 61 D>L  |
| 27383 | A | T | ORF6  | 26 | 61 D>L  |
| 27384 | T | C | ORF6  | 28 | 61 D>L  |
| 27469 | G | A | ORF7a | 1  | 26 G>S  |
| 27807 | C | T | ORF7b | 48 | -       |
| 28271 | A | T | ORF9b | 31 | -       |
| 28290 | C | T | ORF9b | 1  | 3 P>S   |
| 28311 | C | T | ORF9b | 32 | 10 P>S  |
|       |   |   | N     |    | 13 P>L  |
| 28612 | A | G | N     | 1  | -       |
| 28826 | C | T | N     | 2  | 185 R>C |
| 28877 | A | T | N     | 3  | -       |

|       |   |   |   |    |         |
|-------|---|---|---|----|---------|
| 28878 | G | C | N | 3  | -       |
| 28881 | G | A | N | 48 | 203 R>K |
| 28882 | G | A | N | 48 | 203 R>K |
| 28883 | G | C | N | 48 | 204 G>R |
| 29005 | A | T | N | 1  | 244 Q>H |
| 29095 | C | T | N | 1  | -       |
| 29179 | G | T | N | 1  | -       |
| 29253 | C | T | N | 1  | 327 S>L |
| 29301 | A | G | N | 4  | 343 D>G |
| 29510 | A | C | N | 26 | 413 S>R |
| 29568 | T | C | N | 1  | -       |
| 29632 | C | T | N | 3  | -       |
| 29700 | A | G | N | 1  | -       |
| 29744 | G | A | N | 1  | -       |
| 29760 | T | A | N | 3  | -       |

Supplementary Table S3. Detailed information about sequences.

|                     | Delta (n=48) |      |         | Omicron (n=48) |      |         |
|---------------------|--------------|------|---------|----------------|------|---------|
|                     | Min          | Max  | Average | Min            | Max  | Average |
| Coverage (%)        | 95.2         | 99.4 | 98.4    | 92.9           | 99.3 | 96.1    |
| Ns (missing)        | 0            | 1543 | 246     | 11             | 1422 | 873     |
| Frameshift          | 0            | 1    | 0.06    | -              | -    | -       |
| Insertions          | -            | -    | -       | 0              | 9    | 3.4     |
| Deletions           | 13           | 22   | 14      | 18             | 53   | 30.3    |
| AASubstitutions     | 26           | 37   | 33.4    | 42             | 55   | 48.7    |
| Aminoacid Deletions | 4            | 8    | 4.3     | 6              | 16   | 11.3    |

Supplementary Table S4. The overall single nucleotide substitution (SNS) transitions (red) and transversions (blue) (SNS = single nucleotide substitution.).

| Type of SNS | Delta      |                | Omicron    |                |
|-------------|------------|----------------|------------|----------------|
|             | Number (n) | Percentage (%) | Number (n) | Percentage (%) |
| C > T       | 125        | 42.96          | 92         | 42.59          |
| G > T       | 70         | 24.05          | 10         | 3.70           |
| T > C       | 30         | 10.31          | 19         | 8.80           |
| A > G       | 26         | 8.93           | 32         | 14.81          |
| G > A       | 17         | 5.84           | 25         | 11.57          |
| T > A       | 4          | 1.37           | 3          | 1.39           |
| C > A       | 4          | 1.37           | 8          | 4.63           |
| A > C       | 4          | 1.37           | 6          | 2.78           |
| T > G       | 3          | 1.03           | 6          | 3.70           |
| C > G       | 3          | 1.03           | 1          | 0.46           |
| A > T       | 3          | 1.03           | 8          | 2.78           |
| G > C       | 2          | 0.69           | 6          | 2.78           |



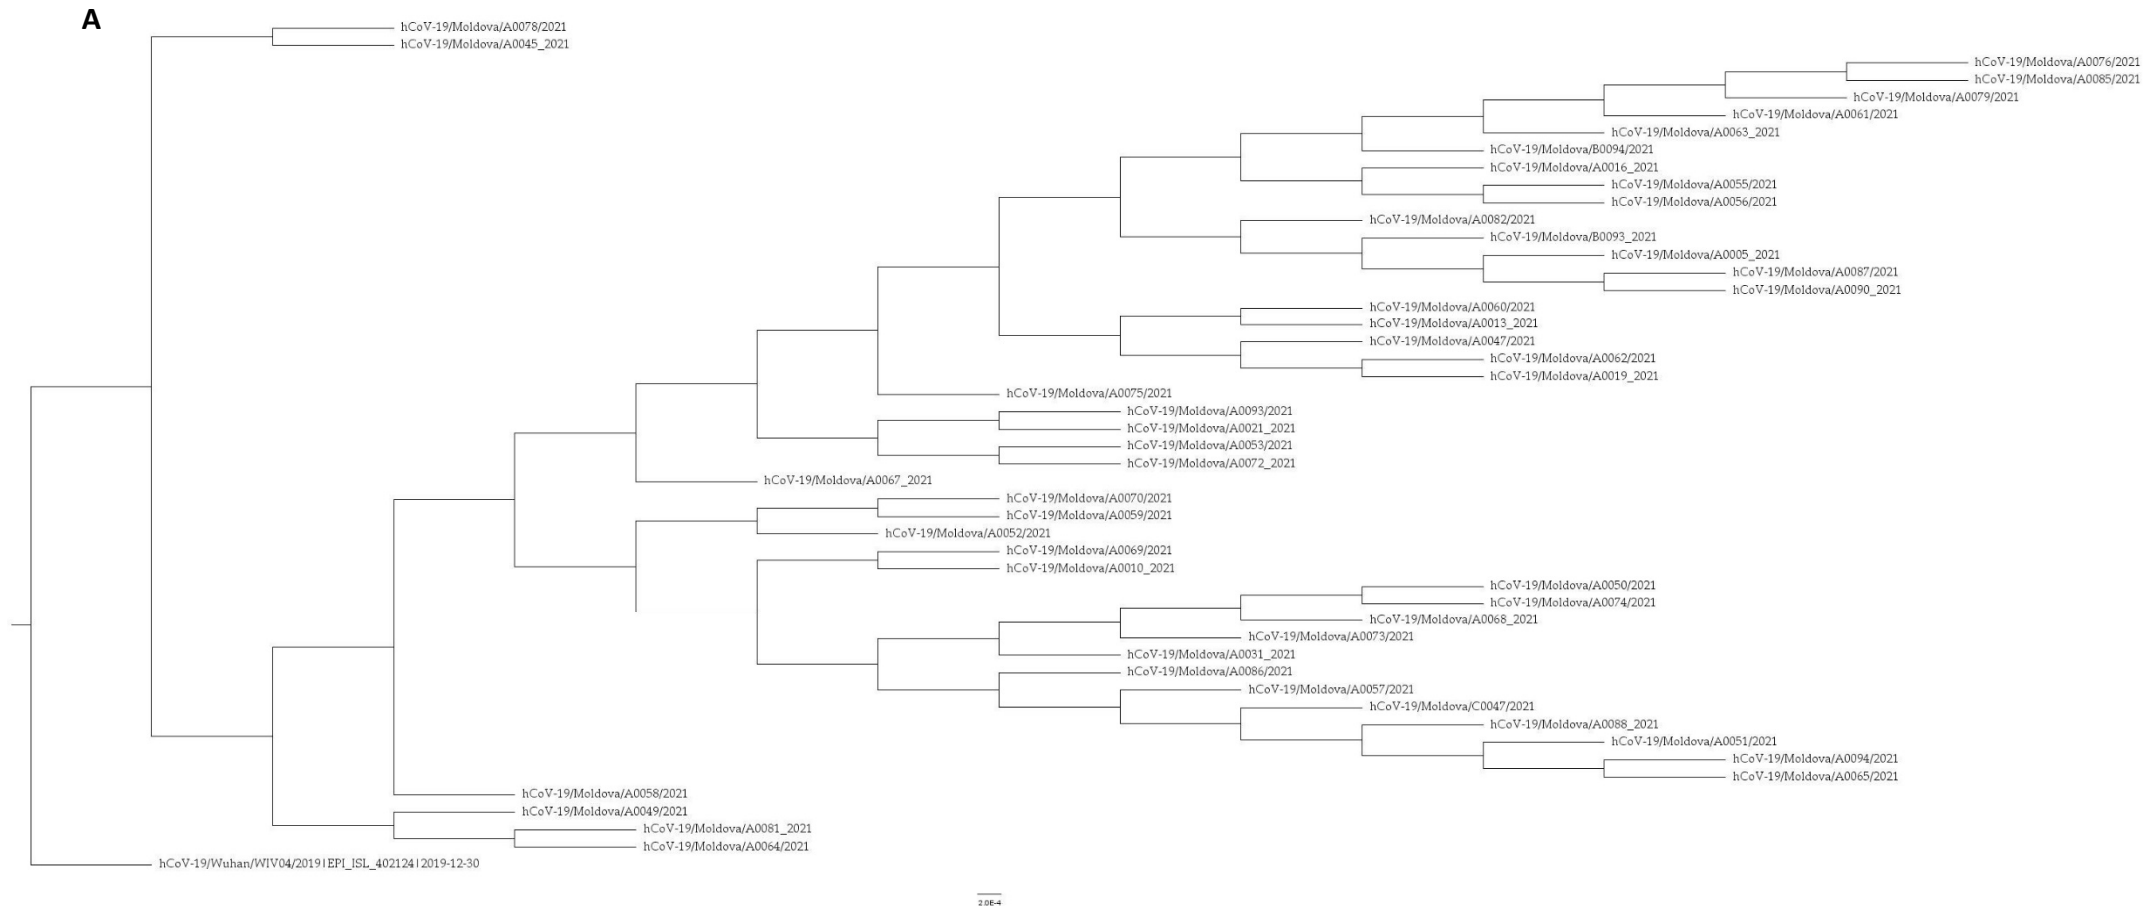

Supplementary **Figure S1**. Phylogenomic analysis of 48 assessed SARS-CoV-2 Delta (A) and Omicron (B) isolates from the Republic of Moldova.

The evolutionary history was inferred by using the Maximum Likelihood method and Tamura-Nei model [13]. The bootstrap consensus tree inferred from 1000 replicates is taken to represent the evolutionary history of the taxa analyzed. Branches corresponding to partitions reproduced in less than 50% bootstrap replicates are collapsed. Initial tree for the heuristic search were obtained by applying the Neighbor-Joining method to a matrix of pairwise distances estimated using the Tamura-Nei model. A discrete Gamma distribution was used to model evolutionary rate differences among sites (5 categories (+G, parameter = 0.1000)). This analysis involved 48 nucleotide sequences. Evolutionary analyses were conducted in MEGA11. Visualization performed in FigTree V.1.4.4.

**B**

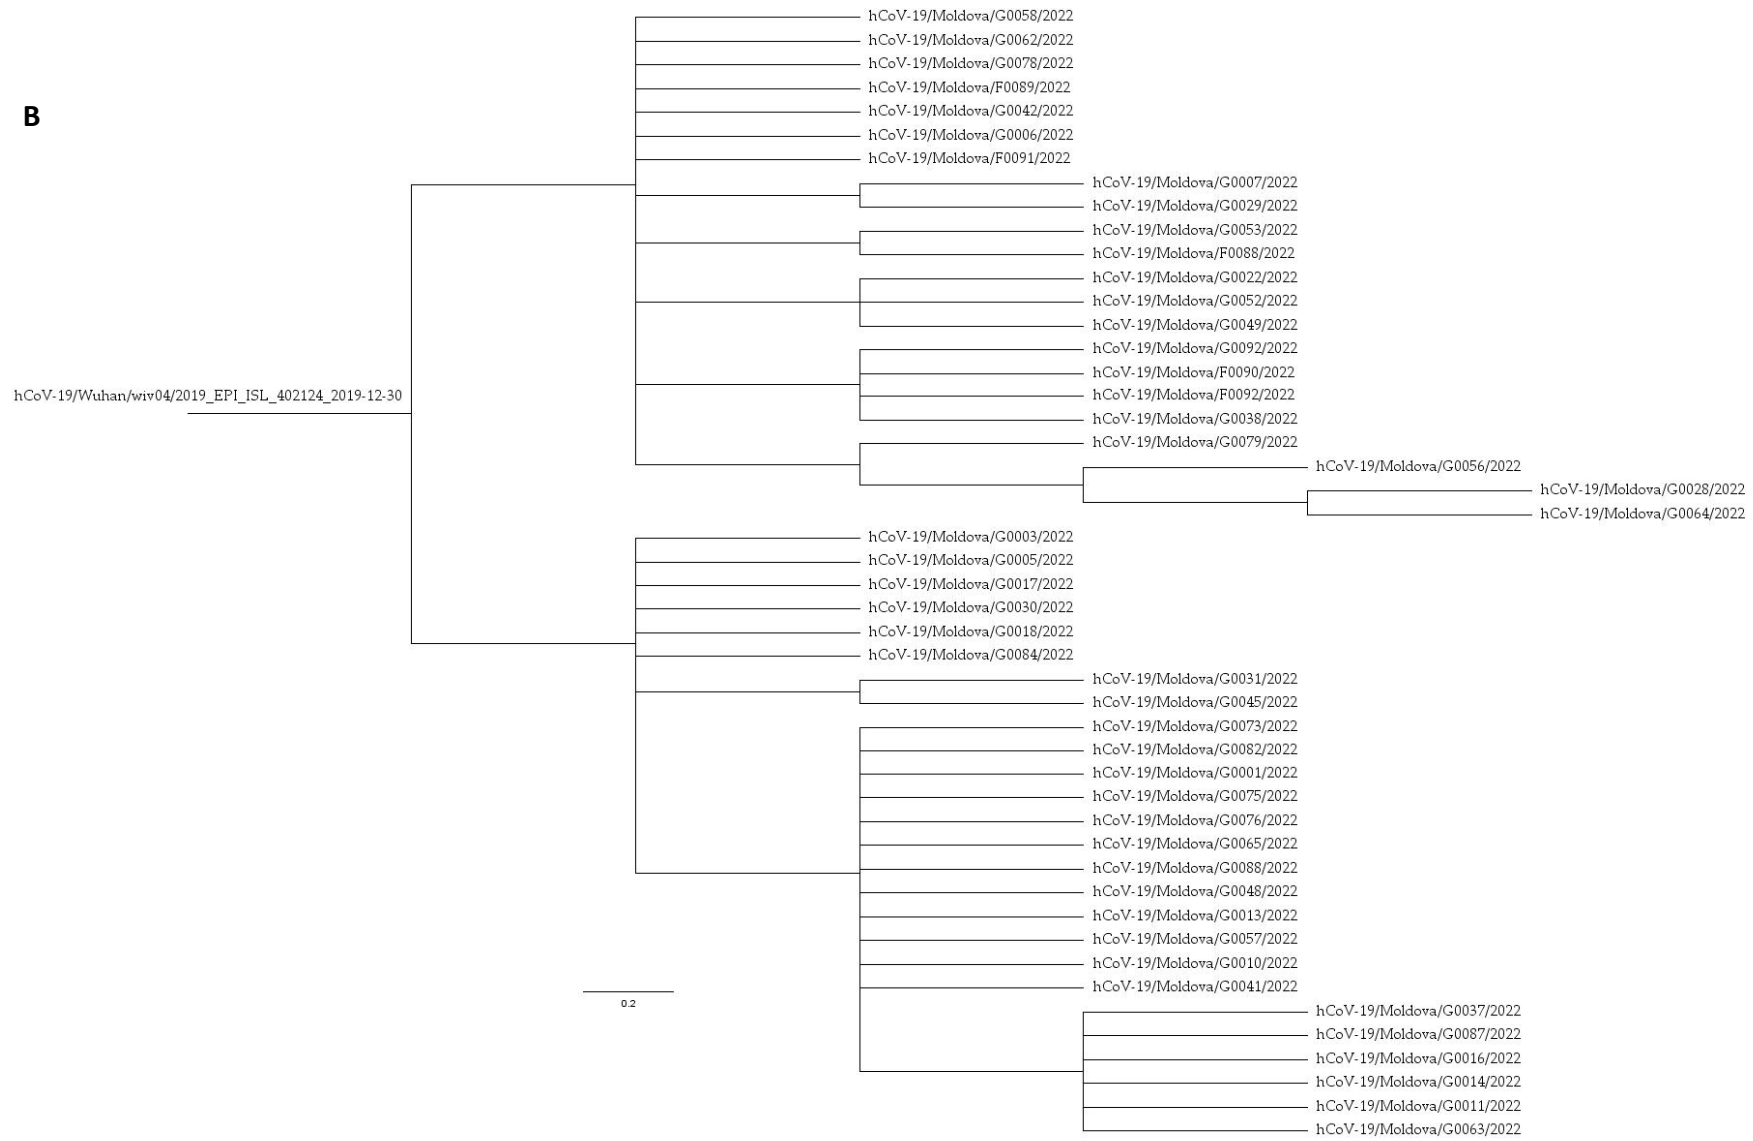

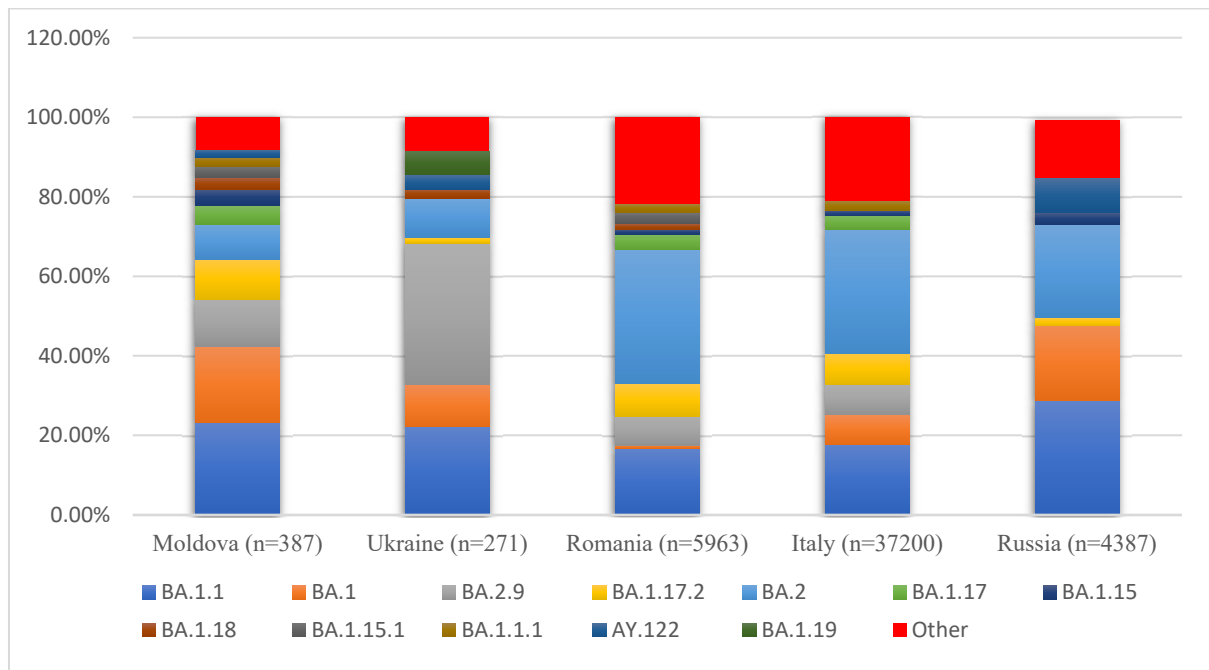

Supplementary Figure S2. Distributions of SARS-CoV-2 lineages in the period January-May 2022.

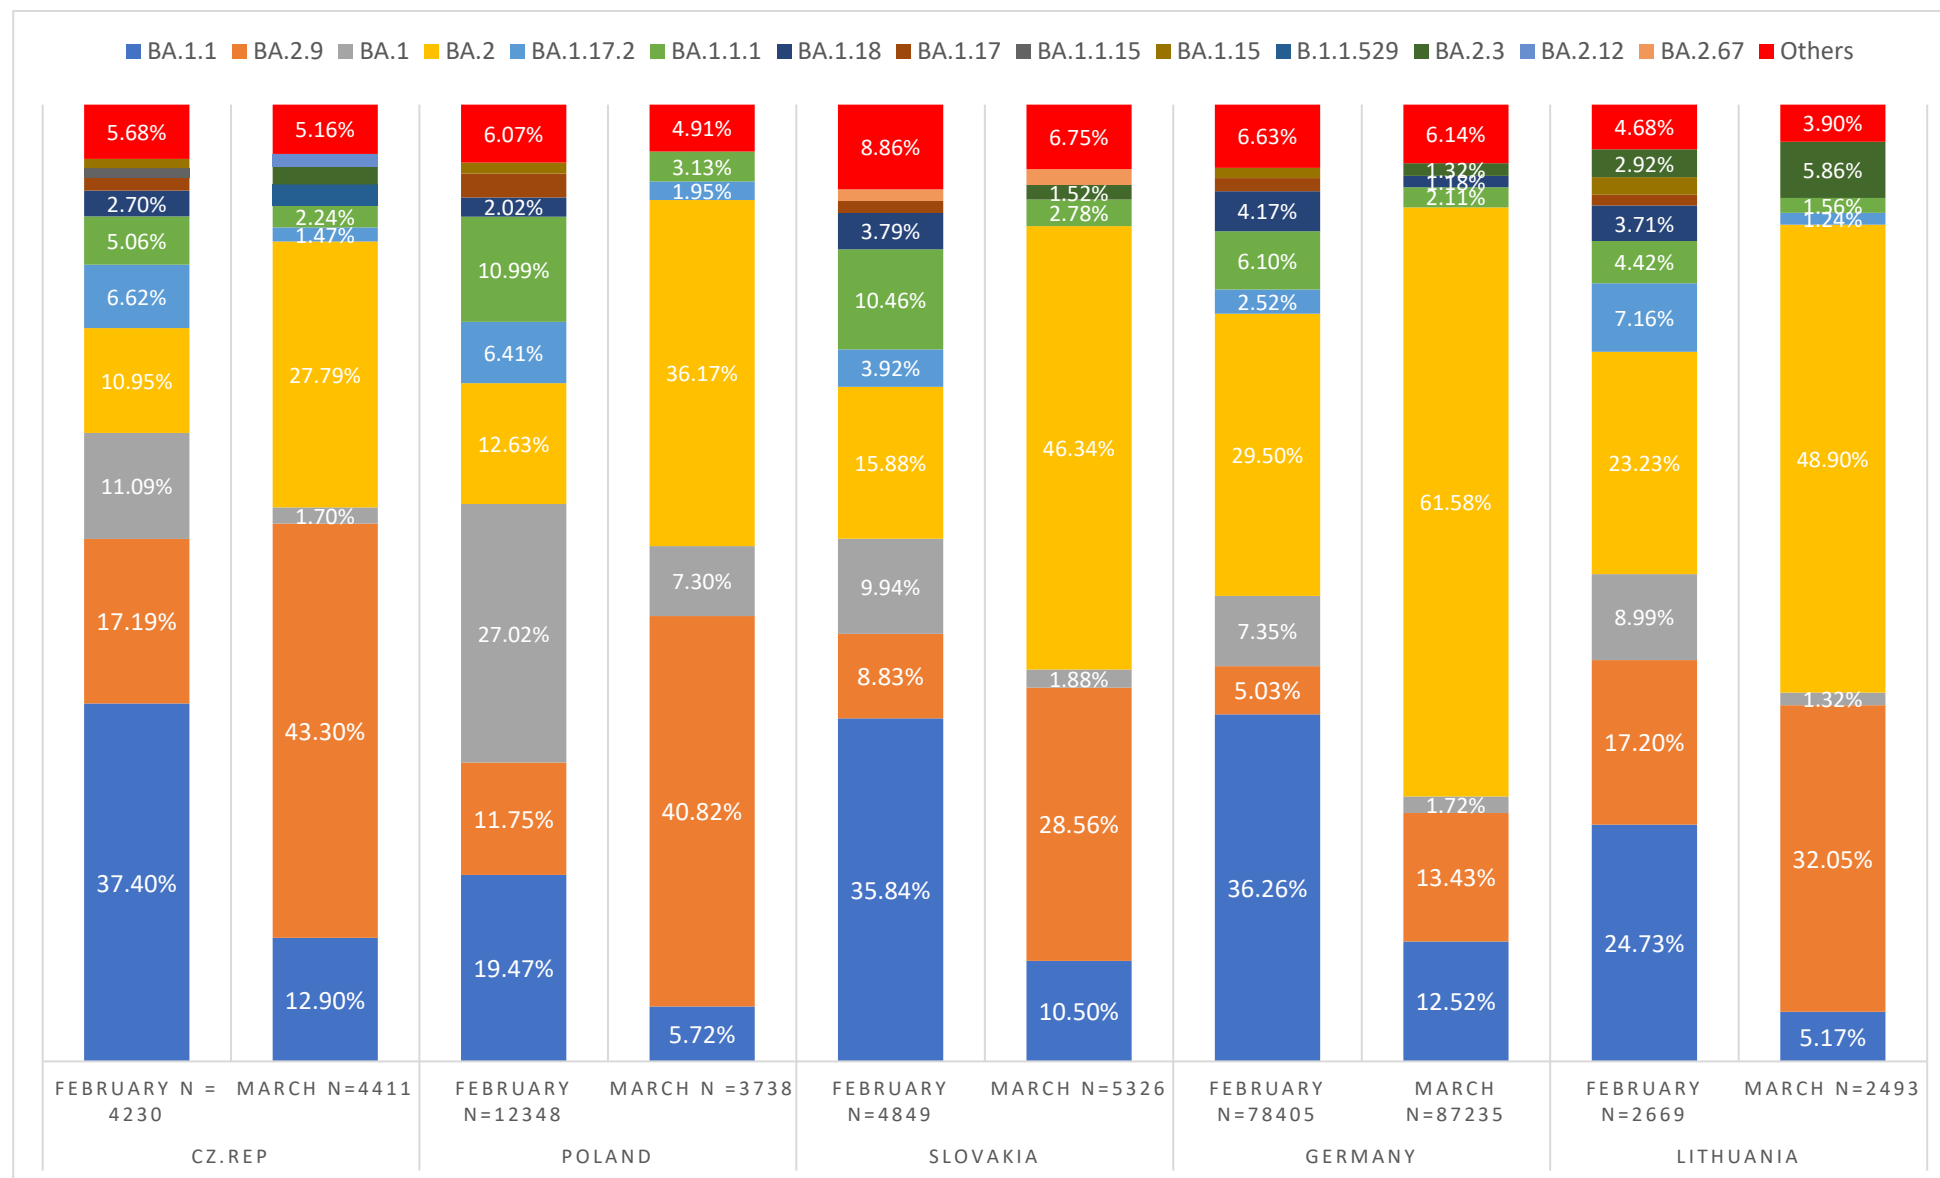

Supplementary Figure S3. Monthly distribution of SARS-CoV-2 lineages between 2 February and March, 2022.
